# Supplementary material
Source: Research Square preprint supplement (doi:10.21203/rs.3.rs-9401766/v1)
Supplement: Supplementary file 1 [file 65dd848388c3f8c8013709b1.xlsx]

## Sheet: FIG.6A
Fig. 6A Changes in cellulase activities of four strains.
time/d	Different strains
	P6	4	15	N6	CK
2	0.34±0.07	0.19±0.04	0.37±0.05	0.21±0.05	0.21±0.05
9	0±0	0±0	0.24±0.04	0.01±0.01	0.44±0.08
16	0±0	0.14±0.05	0.03±0.02	0.02±0.01	0.02±0.01
23	0.39±0.03	0.04±0.02	0.04±0.02	0.05±0.01	0.24±0.05
30	0.01±0.1	0±0	0±0	0±0	0.21±0.09
44	0.01±0.01	0.01±0.01	0.01±0.01	0±0	0.70±0.07

## Sheet: FIG.6B
Fig. 6B Changes in cellulase activities of four strains.
time/d	Different strains
	P6	4	15	N6	CK
2	0.49±0.11	0.35±0.06	0.67±0.07	0±0	0.21±0.08
9	0.05±0.02	0.06±0.03	0.08±0.02	0.16±0.07	0.14±0.03
16	0±0	0.07±0.03	0±0	0.01±0.01	0.11±0.02
23	0.03±0.03	0.02±0.01	0.05±0.02	0.04±0.03	0.04±0.02
30	0.01±0.01	0.01±0	0.02±0.01	0.01±0	0.10±0.04
44	0.01±0.01	0.02±0.01	0.02±0.01	0.01±0.01	0.40±0.04

## Sheet: FIG.6C
Fig. 6A Changes in cellulase activities of four strains.
time/d	Different strains
	P6	4	15	N6	CK
2	0.14±0.04	0.15±0.04	0.23±0.07	0.20±0.03	0.09±0.02
9	0.04±0.01	0.04±0.01	0.02±0.02	0.05±0.03	0.01±0.01
16	0.01±0.01	0±0	0.04±0.01	0.01±0	0.03±0.02
23	0.06±0.02	0.04±0.02	0.04±0.01	0.04±0.02	0.04±0.01
30	0.01±0.01	0.02±0.01	0.01±0.01	0.03±0.01	0.01±0.01
44	0.05±0.01	0.01±0.01	0.05±0.02	0.05±0.01	0.14±0.02

## Sheet: FIG.6D
Fig. 6D Changes in cellulase activities of four strains.
time/d	Different strains
	P6	4	15	N6	CK
2	0.27±0.04	0.20±0.07	0.22±0.06	0.26±0.04	0.03±0.02
9	0.06±0.03	0.01±0.01	0.28±0.07	0.14±0.03	0.01±0.01
16	0.02±0.01	0.05±0.02	0±0	0.03±0.01	0.01±0.01
23	0.05±0.02	0.03±0.01	0.04±0.01	0.04±0.01	0.19±0.06
30	0±0	0.01±0.01	0.01±0.01	0±0	0.19±0.01
44	0.02±0.01	0.01±0	0.07±0.05	0±0	0.16±0.03
