# Supplementary material
Source: Research Square preprint supplement (doi:10.21203/rs.3.rs-9401766/v1)
Supplement: Supplementary file 2 [file 6fb55ab135dcde4902b516e0.xlsx]

## Sheet: FIG.1A
Fig. 1A Changes in mass loss of four strains during the degradation of different substrates
time/d	Different strains
	P6	4	15	N6	CK
2	25.00±0.01	15.00±0.03	0.00±0.00	22.5±0.17	29.00±0.01
9	24.00±0.06	22.00±0.02	14.50±0.24	7.00±0.28	32.50±0.04
16	41.00±0.23	32.50±0.14	4.00±0.13	41.00±0.36	47.50±0.15
23	41.50±0.05	36.00±0.08	44.00±0.08	39.50±0.46	35.50±0.05
30	40.00±0.04	41.00±0.09	50.50±0.19	40.00±0.02	48.00±0.16
44	42.50±0.25	43.00±0.18	47.50±0.35	26.50±0.16	29.50±0.25

## Sheet: FIG.1B
Fig. 1B Changes in mass loss of four strains during the degradation of different substrates
time/d	Different strains
	P6	4	15	N6	CK
2	0±0	7.00±0.16	17.00±0.06	15.00±0.12	33.00±0.03
9	14.50±0.25	28.50±0.47	18.00±0.01	2.00±0.11	24.50±0.14
16	25.00±0.01	24.00±0.35	23.50±0.09	20.00±0.08	31.00±0.58
23	27.00±0.16	28.50±0.28	27.00±0.17	25.00±0.06	24.50±0.39
30	30.50±0.36	28.50±0.86	25.00±0.56	26.00±0.18	20.00±0.28
44	34.50±0.28	32.50±0.16	27.00±0.17	25.50±0.28	27.50±0.16

## Sheet: FIG.1C
Fig. 1C Changes in mass loss of four strains during the degradation of different substrates
time/d	Different strains
	P6	4	15	N6	CK
2	0±0	10.00±0.11	36.00±0.08	5.50±0.11	9.00±0.07
9	21.50±0.12	39.50±0.26	29.50±0.02	0±0	46.00±0.15
16	36.50±0.11	8.50±0.78	54.00±0.04	35.00±0.16	48.00±0.45
23	13.50±0.23	42.00±0.12	41.50±0.23	47.50±0.17	32.00±0.19
30	48.50±0.34	40.50±0.16	55.50±0.45	38.50±0.09	31.50±0.13
44	62.50±0.16	36.50±0.09	62.50±0.18	43.50±0.26	38.50±0.16

## Sheet: FIG.1D
Fig. 1D Changes in mass loss of four strains during the degradation of different substrates
time/d	Different strains
	P6	4	15	N6	CK
2	30.00±0.01	34.00±0.16	0±0	0±0	0.50±0.07
9	32.00±0.09	34.00±0.19	38.50±0.05	27.00±0.02	29.50±0.28
16	38.00±0.16	37.00±0.08	50.50±0.09	27.50±0.09	35.00±0.76
23	41.50±0.58	38.00±0.18	55.50±0.25	37.50±0.07	26.50±0.13
30	42.50±0.25	31.50±0.17	45.00±0.27	36.00±0.18	24.50±0.19
44	48.50±0.06	43.00±0.23	55.50±0.16	30.00±0.76	26.00±0.16
