# Supplementary material
Source: Research Square preprint supplement (doi:10.21203/rs.3.rs-9401766/v1)
Supplement: Supplementary file 3 [file b35336e1a12347a72bfd7647.xlsx]

## Sheet: FIG.5A
Fig. 5A Changes in manganese peroxidase activities among four strains.
time/d	Different strains
	P6	4	15	N6	CK
2	0±0	1.57±0.03	0.21±0.03	0.78±0.14	0.99±0.09
9	0.70±0.09	5.41±0.10	0.58±0.10	7.23±0.05	0.12±0.03
16	6.94±0.03	4.05±0.04	3.35±0.06	0.17±0.05	0.33±0.06
23	2.68±0.10	5.21±0.04	3.00±0.09	0.58±0.10	1.01±0.06
30	11.76±0.11	45.64±0.09	45.21±0.10	78.45±0.13	3.08±0.07
44	8.70±0.04	8.98±0.04	8.84±0.15	38.62±0.04	3.00±0.06

## Sheet: FIG.5B
Fig. 5B Changes in manganese peroxidase activities among four strains.
time/d	Different strains
	P6	4	15	N6	CK
2	1.45±0.11	1.10±0.05	0.95±0.05	1.94±0.03	1.36±0.07
9	0.66±0.10	2.19±0.07	2.45±0.08	1.45±0.15	1.53±0.14
16	3.76±0.06	18.59±0.07	22.38±0.10	26.43±0.13	0.54±0.07
23	2.11±0.04	9.54±0.07	3.18±0.09	11.03±0.09	3.14±0.05
30	51.75±0.11	38.08±0.12	3.80±0.10	14.83±0.07	37.13±0.13
44	11.65±0.06	5.50±0.10	7.87±0.06	43.08±0.16	20.86±0.08

## Sheet: FIG.5C
Fig. 5C Changes in manganese peroxidase activities among four strains.
time/d	Different strains
	P6	4	15	N6	CK
2	1.07±0.04	1.24±0.07	0.08±0.02	0.08±0.02	1.94±0.10
9	2.54±0.11	2.02±0.96	0.45±0.05	1.03±0.07	0.37±0.11
16	17.92±0.08	118.32±0.14	6.70±0.09	0.74±0.06	2.73±0.08
23	8.76±0.13	6.78±0.05	0.08±0.02	1.32±0.14	2.07±0.06
30	36.26±0.15	6.87±0.12	5.70±0.11	4.70±0.11	3.43±0.16
44	11.76±0.14	4.67±0.08	3.78±0.08	3.92±0.07	2.76±0.08

## Sheet: FIG.5D
Fig. 5D Changes in manganese peroxidase activities among four strains.
time/d	Different strains
	P6	4	15	N6	CK
2	0.62±0.05	0.78±0.06	0.37±0.20	0.41±0.07	1.28±0.13
9	0.83±0.09	12.76±0.14	5.16±0.13	10.9±0.05	1.86±0.14
16	0.95±0.08	0.99±0.06	3.50±0.17	0.83±0.14	0.17±0.04
23	3.88±0.07	18.13±0.13	5.67±0.08	19.74±0.14	1.2±0.16
30	62.28±0.16	55.05±0.11	84.33±0.14	111.69±0.08	81.57±0.09
44	11.56±0.14	11.00±0.07	14.17±0.08	68.06±0.15	3.80±0.13
