# Supplementary material
Source: Research Square preprint supplement (doi:10.21203/rs.3.rs-9401766/v1)
Supplement: Supplementary file 4 [file bc006821385aa5d2bf05f3fa.xlsx]

## Sheet: FIG.3A
Fig. 3A Changes in lignin peroxidase of four strains.
time/d	Different strains
	P6	4	15	N6	CK
2	0±0	0.80±0.09	0.84±0.07	0±0	0±0
9	6.77±0.11	2.00±0.06	6.94±0.13	4.17±0.06	3.29±0.04
16	5.98±0.07	1.00±0.07	2.73±0.09	1.67±0.06	6.43±0.07
23	4.32±0.07	0.80±0.13	1.21±0.07	1.64±0.09	2.30±0.08
30	0.71±0.08	0.60±0.08	1.00±0.06	0.60±0.06	0.70±0.07
44	0.97±0.11	0.50±0.09	0.93±0.10	0.60±0.09	0.02±0

## Sheet: FIG.3B
Fig. 3B Changes in lignin peroxidase of four strains.
time/d	Different strains
	P6	4	15	N6	CK
2	0±0	0±0	0±0	0±0	0±0
9	6.49±0.08	5.14±0.04	5.96±0.13	3.89±0.10	4.90±0.11
16	6.00±0.06	4.72±0.08	5.68±0.19	3.20±0.08	1.61±0.09
23	5.60±0.09	4.19±0.10	1.05±0.04	3.10±0.11	3.10±0.10
30	5.42±0.11	3.12±0.08	2.86±0.05	2.56±0.05	3.35±0.11
44	5.42±0.07	2.36±0.09	2.86±0.10	2.54±0.11	3.21±0.08

## Sheet: FIG.3C
Fig. 3C Changes in lignin peroxidase of four strains.
time/d	Different strains
	P6	4	15	N6	CK
2	0±0	0±0	0±0	0±0	0±0
9	3.33±0.11	21.15±0.10	2.45±0.09	1.51±0.11	2.01±0.08
16	3.00±0.06	3.56±0.13	1.78±0.13	1.10±0.05	3.50±0.14
23	2.56±0.16	2.56±0.11	1.54±0.09	0.87±0.09	3.43±0.10
30	1.78±0.07	0.47±0.05	0.41±0.11	0.47±0.10	3.16±0.08
44	1.78±0.14	0.47±0.06	0.41±0.10	0.02±0.01	3.18±0.03

## Sheet: FIG.3D
Fig. 3D Changes in lignin peroxidase of four strains.
time/d	Different strains
	P6	4	15	N6	CK
2	3.22±0.08	6.64±0.07	2.90±0.07	0.95±0.15	0±0
9	7.01±0.11	23.52±0.13	4.50±0.10	2.19±0.07	0.04±0.02
16	4.01±0.07	3.65±0.08	3.43±0.11	1.01±0.07	3.01±0.05
23	2.56±0.11	3.01±0.10	0.49±0.10	6.62±0.14	2.98±0.12
30	0.30±0.04	0.60±0.09	0.32±0.05	0.97±0.14	2.65±0.09
44	0.30±0.07	0±0	0±0	0.44±0.03	2.54±0.14
