# Supplementary material
Source: Research Square preprint supplement (doi:10.21203/rs.3.rs-9401766/v1)
Supplement: Supplementary file 5 [file d3d51a6b491ca709a36d476c.xlsx]

## Sheet: FIG.4A
Fig. 4A Changes in laccase activities of four strains.
time/d	Different strains
	P6	4	15	N6	CK
2	0±0	0±0	0.12±0.01	0±0	0±0
9	21.88±0.11	3.19±0.06	1.10±0.01	11.73±0.12	0.09±0.01
16	11.82±0.10	1.83±0.06	8.36±0.12	7.48±0.23	74.42±0.12
23	15.12±0.07	1.41±0.12	62.8±0.58	11.74±0.37	0.96±0.01
30	0.44±0.07	0.25±0.07	1.17±0.03	0.93±0.02	1.28±0.20
44	0.93±0.06	0.20±0.03	2.99±0.01	0.80±0.01	0.92±0.06

## Sheet: FIG.4B
Fig. 4B Changes in laccase activities of four strains.
time/d	Different strains
	P6	4	15	N6	CK
2	0.15±0.02	0.21±0.02	0.24±0.02	0±0	0.24±0.04
9	7.35±0.04	9.09±0.03	31.3±0.05	30.86±0.03	0.66±0.05
16	3.83±0.03	0.29±0.02	14.47±0.06	20.28±0.02	0.36±0.03
23	8.69±0.02	6.38±0.03	0.15±0.02	15.59±0.09	0.21±0.03
30	0.42±0.02	1.7±0.02	0.35±0.02	0.78±0.02	0.61±0.06
44	0.43±0.01	0.2±0.01	1.15±0.03	0.49±0.04	0.67±0.03

## Sheet: FIG.4C
Fig. 4C Changes in laccase activities of four strains.
time/d	Different strains
	P6	4	15	N6	CK
2	1.94±0.03	0±0	0.43±0.05	0±0	0±0
9	28.94±0.03	3.28±0.06	0.99±0.02	1.12±0.03	1.83±0.03
16	17.44±0.08	0.34±0.04	5.08±0.03	3.91±0.04	2.12±0.05
23	0.56±0.06	6.45±0.06	0.54±0.02	2.81±0.04	0.57±0.05
30	2.2±0.05	1.70±0.04	0.35±0.04	2.46±0.05	2.36±0.07
44	1.61±0.05	0.40±0.06	0.90±0.04	1.89±0.09	1.06±0.06

## Sheet: FIG.4D
Fig. 4D Changes in laccase activities of four strains.
time/d	Different strains
	P6	4	15	N6	CK
2	0±0	0±0	0±0	1.44±0	0±0
9	82.89±0.11	41.7±0.06	2.33±0.01	80.25±0.12	0.23±0.01
16	108.39±0.10	73.2±0.06	11.99±0.12	68.64±0.23	0.83±0.12
23	1.04±0.07	1.23±0.12	1.43±0.58	6.48±0.37	0.06±0.01
30	0.69±0.07	1.00±0.07	1.52±0.03	10.82±0.02	0.81±0.20
44	0.60±0.06	0.73±0.29	0.77±0.01	4.37±0.01	0.30±0.06
