# Supplementary material
Source: Research Square preprint supplement (doi:10.21203/rs.3.rs-9401766/v1)
Supplement: Supplementary file 6 [file f04b0a8e223b4ab551f52b9c.xlsx]

## Sheet: FIG.2A
Fig. 2A Changes in the daily average degradation rate of four strains during the degradation of different substrates
time/d	Different strains
	P6	4	15	N6
9	2.67±0.11 a	2.44±0.09 a	1.61±0.03 b	0.78±0.02 d
16	2.56±0.04 a	2.03±0.04 b	0.25±0.04 d	2.56±0.13 a
23	1.80±0.05 b	1.57±0.07 c	1.91±0.06 a	1.72±0.07 b
30	1.33±0.10 c	1.37±0.04 d	1.68±0.07 b	1.33±0.11 c
44	0.97±0.02 d	0.98±0.03 e	1.08±0.05 c	0.60±0.03 e
Note: Mean values are marked with different lower case letters are significantly different (P < 0.05)

## Sheet: FIG.2B
Fig. 2B Changes in the daily average degradation rate of four strains during the degradation of different substrates
time/d	Different strains
	P6	4	15	N6
9	1.61±0.09 a	3.17±0.05 a	2.00±0.07 a	0.22±0.09 e
16	1.56±0.05 a	1.50±0.11 b	1.47±0.07 b	1.25±0.05 a
23	1.17±0.06 b	1.24±0.07 c	1.17±0.07 c	1.09±0.04 b
30	1.02±0.11 c	0.95±0.03 d	0.83±0.08 d	0.87±0.05 c
44	0.78±0.02 d	0.74±0.03 e	0.61±0.06 e	0.58±0.06 d
Note: Mean values are marked with different lower case letters are significantly different (P < 0.05)

## Sheet: FIG.2C
Fig. 2C Changes in the daily average degradation rate of four strains during the degradation of different substrates
time/d	Different strains
	P6	4	15	N6
9	2.39±0.04 a	4.39±0.08 a	3.28±0.10 a	0±0 d
16	2.28±0.04 a	0.53±0.10 e	3.38±0.08 a	2.19±0.08 a
23	0.59±0.09 d	1.83±0.09 b	1.8±0.08 b	2.07±0.13 a
30	1.62±0.05 b	1.35±0.09 c	1.85±0.00 b	1.28±0.09 b
44	1.42±0.08 c	0.83±0.06 d	1.42±0.08 c	0.99±0.07 c
Note: Mean values are marked with different lower case letters are significantly different (P < 0.05)

## Sheet: FIG.2D
Fig. 2D Changes in the daily average degradation rate of four strains during the degradation of different substrates
time/d	Different strains
	P6	4	15	N6
9	3.56±0.11 a	3.78±0.08 a	4.28±0.07 a	3.00±0.06 a
16	2.38±0.07 b	2.31±0.08 b	3.16±0.07 b	1.72±0.06 b
23	1.80±0.06 c	1.65±0.07 c	2.41±0.07 c	1.63±0.07 b
30	1.42±0.07 d	1.05±0.03 d	1.50±0.06 e	1.20±0.09 c
44	1.10±0.05 e	0.98±0.05 d	2.16±0.05 d	0.68±0.07 d
Note: Mean values are marked with different lower case letters are significantly different (P < 0.05)
